# Supplementary material for: The Intestinal Microbiota Interferes with the microRNA Response upon Oral Listeria Infection
Source: PubMed Central journal article supplement — mBio. 2013 Dec 10;4(6):e00707-13. doi: 10.1128/mBio.00707-13 (PMC3870255; doi:10.1128/mbio.00707-13), 2013-12-10
Supplement: mbo006131684sf02.pdf [file mbo006131684sf02.pdf]

Figure S2

A

Fold change / uninfected CV

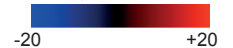

CV 24 p.i.

|      | Gene name       | Description                                                                    |
|------|-----------------|--------------------------------------------------------------------------------|
| 4.4  | Olfir767        | olfactory receptor 767 (Olfir767)                                              |
| 3.6  | Ly6a            | lymphocyte antigen 6 complex, locus A (Ly6a)                                   |
| 3.0  | Gm4416          | PREDICTED: similar to ribosomal protein (LOC100047795)                         |
| 2.9  | 1700047G07Rik   | Putative uncharacterized protein (Fragment) gene:ENSMUSG00000053206            |
| 2.7  | Snord15a        | small nucleolar RNA, C/D box 15A (Snord15a), small nucleolar RNA.              |
| 2.5  | Nudt5           | nudix (nucleoside diphosphate linked moiety X)-type motif 5 (Nudt5)            |
| 2.4  | ---             | NOD-derived CD11c +ve dendritic cells cDNA, RIKEN clone:F630046N03             |
| 2.3  | Ifitm3          | interferon induced transmembrane protein 3 (Ifitm3)                            |
| 2.3  | Atf3            | activating transcription factor 3 (Atf3)                                       |
| 2.3  | Prr23a          | proline rich 23A (Prr23a)                                                      |
| 2.3  | Upp1            | uridine phosphorylase 1 (Upp1)                                                 |
| 2.2  | Slc10a2         | solute carrier family 10, member 2 (Slc10a2)                                   |
| 2.1  | Gm9513          | predicted gene 9513 (Gm9513)                                                   |
| 2.1  | Gm5100          | PREDICTED: predicted gene, EG329126 (EG329126), misc RNA.                      |
| 2.1  | C2cd4b          | C2 calcium-dependent domain containing 4B (C2cd4b)                             |
| 2.1  | ---             | gij34538597[refjNC_005089.1]:c14139-14071, tRNA-Glu                            |
| 2.1  | Slnf2           | schlafen 2 (Slnf2)                                                             |
| -2.0 | Lama3           | laminin, alpha 3 (Lama3)                                                       |
| -2.1 | Hbb-b1          | hemoglobin, beta adult major chain (Hbb-b1)                                    |
| -2.1 | Gm8979          | predicted gene 8979 (Gm8979), non-coding RNA.                                  |
| -2.1 | Hba-a2          | hemoglobin alpha, adult chain 2 (Hba-a2)                                       |
| -2.2 | IghmAC38.205.12 | Ig heavy chain V region AC38 205.12 gene:ENSMUSG00000076701                    |
| -2.2 | Defa5           | defensin, alpha, 5 (Defa5)                                                     |
| -2.2 | Gm15315         | predicted gene 15315 (Gm15315)                                                 |
| -2.2 | Gm10104         | predicted gene 10104 (Gm10104)                                                 |
| -2.2 | Spink4          | serine peptidase inhibitor, Kazal type 4 (Spink4)                              |
| -2.2 | Clec2e          | C-type lectin domain family 2, member e (Clec2e)                               |
| -2.2 | Xist            | inactive X specific transcripts (Xist)                                         |
| -2.3 | Defa25          | defensin, alpha, 25 (Defa25)                                                   |
| -2.3 | Trp53inp1       | transformation related protein 53 inducible nuclear protein 1 (Trp53inp1)      |
| -2.3 | LOC435333       | Ig heavy chain V region VH558 A1/A4 gene:ENSMUSG00000076743                    |
| -2.3 | Rpl38           | ribosomal protein L38 (Rpl38)                                                  |
| -2.3 | Mt2             | metallothionein 2 (Mt2)                                                        |
| -2.3 | Cyp2b10         | cytochrome P450, family 2, subfamily b, polypeptide 10 (Cyp2b10)               |
| -2.3 | Npl             | N-acetylneuraminase pyruvate lyase (Npl)                                       |
| -2.3 | Defa26          | defensin, alpha, 26 (Defa26)                                                   |
| -2.3 | Plb1            | phospholipase B1 (Plb1)                                                        |
| -2.4 | Defa24          | defensin, alpha, 24 (Defa24)                                                   |
| -2.4 | ---             | mammary tumor virus clone 66C env precursor (env) and vSAG protein (vSAG) mRNA |
| -2.4 | Slc25a36        | solute carrier family 25, member 36 (Slc25a36)                                 |
| -2.4 | Defa-ps1        | defensin, alpha, pseudogene 1 (Defa-ps1), non-coding RNA.                      |
| -2.5 | Gm10880         | LOC100046793 protein gene:ENSMUSG00000076543                                   |
| -2.5 | Gm1419          | anti-human melanoma monoclonal antibody light chain variable region-like mRNA  |
| -2.5 | ---             | immunoglobulin heavy chain complex, mRNA (cDNA clone MGC:6529)                 |
| -2.5 | Tm4sf4          | transmembrane 4 superfamily member 4 (Tm4sf4)                                  |
| -2.5 | Gm14850         | predicted gene 14850 (Gm14850)                                                 |
| -2.6 | Cyp2d26         | cytochrome P450, family 2, subfamily d, polypeptide 26 (Cyp2d26)               |
| -2.6 | Fgf15           | fibroblast growth factor 15 (Fgf15)                                            |
| -2.7 | ---             | immunoglobulin heavy chain complex, mRNA (cDNA clone MGC:102667)               |
| -2.7 | ---             | Ig kappa chain, mRNA (cDNA clone MGC:30228 IMAGE:4206515)                      |
| -2.7 | LOC100046275    | similar to Igha protein gene:ENSMUSG00000076731                                |
| -2.7 | Gm6696          | predicted gene 6696 (Gm6696)                                                   |
| -2.8 | Itln1           | intelectin 1 (galactofuranose binding) (Itln1)                                 |
| -2.8 | AY761184        | cDNA sequence AY761184 (AY761184)                                              |
| -2.9 | ---             | anti-human CD21 immunoglobulin kappa light chain mRNA                          |
| -2.9 | Lct             | lactase (Lct)                                                                  |
| -3.0 | Igj             | immunoglobulin joining chain (Igj)                                             |
| -3.0 | Cubn            | cubilin (intrinsic factor-cobalamin receptor) (Cubn)                           |
| -3.0 | Lyz1            | lysozyme 1 (Lyz1)                                                              |
| -3.1 | AY036118        | ETS-related transcription factor ERF (Erf1) mRNA                               |
| -3.2 | Cyp2c65         | cytochrome P450, family 2, subfamily c, polypeptide 65 (Cyp2c65)               |
| -3.4 | Ighv1-72        | Ig active mu-chain mRNA V-D-J2-C region                                        |
| -3.7 | Igk             | immunoglobulin kappa chain complex, mRNA (cDNA clone MGC:150007)               |
| -4.0 | Igk-V19-14      | anti-DNA light chain (Vk19) mRNA, partial cds.                                 |
| -4.0 | Gm189           | Anti-VIPase light chain variable region gene:ENSMUSG00000076556                |
| -4.0 | Cyp2c55         | cytochrome P450, family 2, subfamily c, polypeptide 55 (Cyp2c55)               |
| -4.5 | ---             | immunoglobulin heavy chain complex, mRNA (cDNA clone MGC:40652)                |
| -4.5 | Cyp3a11         | cytochrome P450, family 3, subfamily a, polypeptide 11 (Cyp3a11)               |
| -5.1 | ---             | cdna:known chromosome:NCBIM37:6:68686291:68686758:-1 gene:ENSMUSG00000076530   |
| -5.3 | ---             | cdna:known chromosome:NCBIM37:6:70264889:70265446:-1 gene:ENSMUSG00000076586   |
| -5.5 | Gm4964          | mRNA for IgG1/kappa antibody, scFv48-CK.                                       |
| -5.5 | Cyp3a25         | cytochrome P450, family 3, subfamily a, polypeptide 25 (Cyp3a25)               |
| -7.9 | Dub2a           | deubiquitinating enzyme 2a (Dub2a)                                             |
| -8.0 | V165-D-J-C mu   | V165-D-J-C mu protein gene:ENSMUSG00000076717                                  |

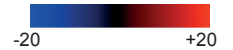

CV 72 p.i.

|     | Gene name     | Description                                                                                       |
|-----|---------------|---------------------------------------------------------------------------------------------------|
| 2.8 | Fabp1         | fatty acid binding protein 1, liver (Fabp1)                                                       |
| 2.8 | 1810011O10Rik | RIKEN cDNA 1810011O10 gene (1810011O10Rik)                                                        |
| 2.7 | Gm12250       | predicted gene 12250 (Gm12250)                                                                    |
| 2.6 | Atf3          | activating transcription factor 3 (Atf3)                                                          |
| 2.6 | --            | ncrna:snRNA chromosome:NCBIM37:9:90246833:90246977:1 gene:ENSMUSG00000065881                      |
| 2.6 | Rasgef1b      | RasGEF domain family, member 1B (Rasgef1b)                                                        |
| 2.6 | Slc2a2        | solute carrier family 2 (facilitated glucose transporter), member 2 (Slc2a2)                      |
| 2.5 | Snord15a      | small nucleolar RNA, C/D box 15A (Snord15a), small nucleolar RNA.                                 |
| 2.4 | Gm5574        | Ig kappa chain V-V region L7 gene:ENSMUSG00000076563                                              |
| 2.4 | AI324046      | mRNA for immunoglobulin gamma-3 heavy chain precursor                                             |
| 2.4 | Upp1          | uridine phosphorylase 1 (Upp1)                                                                    |
| 2.3 | Casp6         | caspase 6 (Casp6)                                                                                 |
| 2.3 | Mpa2l         | macrophage activation 2 like (Mpa2l)                                                              |
| 2.3 | Zbp1          | Z-DNA binding protein 1 (Zbp1)                                                                    |
| 2.2 | Oasl2         | 2'-5' oligoadenylate synthetase-like 2 (Oasl2)                                                    |
| 2.2 | Apoc2         | apolipoprotein C-II (Apoc2)                                                                       |
| 2.2 | Hsph1         | heat shock 105kDa/110kDa protein 1 (Hsph1)                                                        |
| 2.2 | Hbegf         | heparin-binding EGF-like growth factor (Hbegf)                                                    |
| 2.2 | Rbp2          | retinol binding protein 2, cellular (Rbp2)                                                        |
| 2.1 | G6pc          | glucose-6-phosphatase, catalytic (G6pc)                                                           |
| 2.0 | Apol10a       | apolipoprotein L 10a (Apol10a)                                                                    |
| 2.0 | Casp3         | caspase 3 (Casp3)                                                                                 |
| 2.0 | Herc5         | hect domain and RLD 5 (Herc5)                                                                     |
| 2.0 | Psmb8         | proteasome (prosome, macropain) subunit, beta type 8 (large multifunctional peptidase 7) (Psmb8)  |
| 1.9 | Acot12        | acyl-CoA thioesterase 12 (Acot12)                                                                 |
| 1.9 | Ada           | adenosine deaminase (Ada)                                                                         |
| 1.9 | --            | cdna:pseudogene chromosome:NCBIM37:2:18570712:18570973:-1 gene:ENSMUSG00000086882                 |
| 1.9 | Cycs          | cytochrome c, somatic (Cycs), nuclear gene encoding mitochondrial protein                         |
| 1.9 | --            | immunoglobulin heavy chain complex, mRNA (cDNA clone MGC:102667)                                  |
| 1.9 | Iftm3         | interferon induced transmembrane protein 3 (Iftm3)                                                |
| 1.9 | Pck1          | phosphoenolpyruvate carboxykinase 1, cytosolic (Pck1)                                             |
| 1.9 | 2610029I01Rik | RIKEN cDNA 2610029I01 gene (2610029I01Rik)                                                        |
| 1.9 | 4933417A18Rik | RIKEN cDNA 4933417A18 gene (4933417A18Rik)                                                        |
| 1.9 | LOC100046275  | similar to Igha protein gene:ENSMUSG00000076731                                                   |
| 1.9 | Sfn           | stratifin (Sfn)                                                                                   |
| 1.8 | Apol9a        | apolipoprotein L 9a (Apol9a)                                                                      |
| 1.8 | Bco2          | beta-carotene oxygenase 2 (Bco2)                                                                  |
| 1.8 | Gprc5a        | G protein-coupled receptor, family C, group 5, member A (Gprc5a)                                  |
| 1.8 | Hsd17b6       | hydroxysteroid (17-beta) dehydrogenase 6 (Hsd17b6)                                                |
| 1.8 | --            | ncrna:snRNA chromosome:NCBIM37:1:72272814:72273004:1 gene:ENSMUSG00000075752                      |
| 1.8 | Stat1         | signal transducer and activator of transcription 1 (Stat1)                                        |
| 1.8 | Stat2         | signal transducer and activator of transcription 2 (Stat2)                                        |
| 1.8 | Snora23       | small nucleolar RNA, H/ACA box 23 (Snora23), small nucleolar RNA.                                 |
| 1.8 | Tap1          | transporter 1, ATP-binding cassette, sub-family B (MDR/TAP) (Tap1)                                |
| 1.7 | Aldh4a1       | aldehyde dehydrogenase 4 family, member A1 (Aldh4a1), nuclear gene encoding mitochondrial protein |
| 1.7 | Apol7a        | apolipoprotein L 7a (Apol7a)                                                                      |
| 1.7 | Ddx60         | DEAD (Asp-Glu-Ala-Asp) box polypeptide 60 (Ddx60)                                                 |
| 1.7 | Tra2a         | transformer 2 alpha homolog (Drosophila) (Tra2a)                                                  |

Figure S2

B

Fold change / uninfected CV

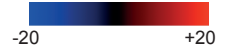

CV 72 p.i.

|      | Gene name     | Description                                                                     |
|------|---------------|---------------------------------------------------------------------------------|
| -5.8 | V165-D-J-C mu | V165-D-J-C mu protein gene:ENSMUSG00000076717                                   |
| -4.1 | ---           | cdna:known chromosome:NCBIM37:6:67505630:67506210:1 gene:ENSMUSG00000076501     |
| -3.7 | ---           | immunoglobulin heavy chain complex, mRNA (cDNA clone MGC:40652)                 |
| -3.5 | ---           | cdna:known chromosome:NCBIM37:6:68686291:68686758:-1 gene:ENSMUSG00000076530    |
| -3.3 | Gm189         | Anti-VIPase light chain variable region gene:ENSMUSG00000076556                 |
| -3.3 | Hba-a1        | hemoglobin alpha, adult chain 1 (Hba-a1)                                        |
| -3.3 | Lyz1          | lysozyme 1 (Lyz1)                                                               |
| -3.2 | Hba-a2        | hemoglobin alpha, adult chain 2 (Hba-a2)                                        |
| -3.2 | Hbb-b1        | hemoglobin, beta adult major chain (Hbb-b1)                                     |
| -3.0 | Cyp2c55       | cytochrome P450, family 2, subfamily c, polypeptide 55 (Cyp2c55)                |
| -2.9 | Dub2a         | deubiquitinating enzyme 2a (Dub2a)                                              |
| -2.6 | Cyp3a11       | cytochrome P450, family 3, subfamily a, polypeptide 11 (Cyp3a11)                |
| -2.6 | Fgf15         | fibroblast growth factor 15 (Fgf15)                                             |
| -2.5 | ---           | cDNA clone MGC:25820 IMAGE:4164906                                              |
| -2.5 | Itln1         | intelectin 1 (galactofuranose binding) (Itln1)                                  |
| -2.4 | Defa26        | defensin, alpha, 26 (Defa26)                                                    |
| -2.4 | Defa-rs1      | defensin, alpha, related sequence 1 (Defa-rs1)                                  |
| -2.4 | AY036118      | ETS-related transcription factor ERF (Erf1)                                     |
| -2.4 | Gm4964        | mRNA for IgG1/kappa antibody, scFv48-CK.                                        |
| -2.4 | Gm7849        | predicted gene 7849 (Gm7849)                                                    |
| -2.4 | Spink4        | serine peptidase inhibitor, Kazal type 4 (Spink4)                               |
| -2.3 | AY761184      | cDNA sequence AY761184 (AY761184)                                               |
| -2.3 | Ighv1-72      | Mouse Ig active mu-chain mRNA V-D-J2-C region, clone 18C10.                     |
| -2.3 | Gm14851       | predicted gene 14851 (Gm14851)                                                  |
| -2.2 | Defa17        | defensin, alpha, 17 (Defa17)                                                    |
| -2.2 | Defa20        | defensin, alpha, 20 (Defa20)                                                    |
| -2.2 | Defa23        | defensin, alpha, 23 (Defa23)                                                    |
| -2.2 | Defa-ps1      | defensin, alpha, pseudogene 1 (Defa-ps1), non-coding RNA.                       |
| -2.2 | Lyz2          | lysozyme 2 (Lyz2)                                                               |
| -2.1 | Cyp3a25       | cytochrome P450, family 3, subfamily a, polypeptide 25 (Cyp3a25)                |
| -2.1 | Defa25        | defensin, alpha, 25 (Defa25)                                                    |
| -2.1 | Mmp7          | matrix metalloproteinase 7 (Mmp7)                                               |
| -2.1 | Pnliprp2      | pancreatic lipase-related protein 2 (Pnliprp2)                                  |
| -2.1 | Gm10104       | predicted gene 10104 (Gm10104)                                                  |
| -2.0 | Defa21        | defensin, alpha, 21 (Defa21)                                                    |
| -2.0 | Defa5         | defensin, alpha, 5 (Defa5)                                                      |
| -2.0 | Gm14850       | predicted gene 14850 (Gm14850)                                                  |
| -2.0 | Gm15284       | predicted gene 15284 (Gm15284)                                                  |
| -2.0 | Gm6696        | predicted gene 6696 (Gm6696)                                                    |
| -1.9 | Defa22        | defensin, alpha, 22 (Defa22)                                                    |
| -1.9 | Imp3          | IMP3, U3 small nucleolar ribonucleoprotein, homolog (yeast) (Imp3)              |
| -1.9 | ---           | Mouse mammary tumor virus clone 66C env precursor (env) and vSAG protein (vSAG) |
| -1.9 | Gm15315       | predicted gene 15315 (Gm15315)                                                  |
| -1.9 | Gm8979        | predicted gene 8979 (Gm8979), non-coding RNA.                                   |
| -1.9 | Slc12a2       | solute carrier family 12, member 2 (Slc12a2)                                    |
| -1.9 | Tm4sf4        | transmembrane 4 superfamily member 4 (Tm4sf4)                                   |
| -1.8 | Gm10880       | LOC100046793 protein gene:ENSMUSG00000076543                                    |
| -1.8 | Pyy           | peptide YY (Pyy)                                                                |

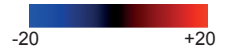

GF 24 p.i.

|       | Gene name | Description                                                                  |
|-------|-----------|------------------------------------------------------------------------------|
| 15.5  | Fabp1     | fatty acid binding protein 1, liver (Fabp1)                                  |
| 6.3   | Slc9a3    | solute carrier family 9 (sodium/hydrogen exchanger), member 3 (Slc9a3)       |
| 6.3   | Lct       | lactase (Lct)                                                                |
| 5.6   | Adh6a     | alcohol dehydrogenase 6A (class V) (Adh6a)                                   |
| 5.3   | Slc36a1   | solute carrier family 36 (proton/amino acid symporter), member 1 (Slc36a1)   |
| 5.2   | Reg3b     | regenerating islet-derived 3 beta (Reg3b)                                    |
| 3.6   | Ugt2a3    | UDP glucuronosyltransferase 2 family, polypeptide A3 (Ugt2a3)                |
| 3.5   | Ptk6      | PTK6 protein tyrosine kinase 6 (Ptk6)                                        |
| 3.4   | Slc2a2    | solute carrier family 2 (facilitated glucose transporter), member 2 (Slc2a2) |
| 3.2   | Cyp2b10   | cytochrome P450, family 2, subfamily b, polypeptide 10 (Cyp2b10)             |
| 3.1   | Cyp3a25   | cytochrome P450, family 3, subfamily a, polypeptide 25 (Cyp3a25)             |
| 3.1   | Apol10a   | apolipoprotein L 10a (Apol10a)                                               |
| 3.0   | Apoc3     | apolipoprotein C-III (Apoc3)                                                 |
| -3.2  | Slc10a2   | solute carrier family 10, member 2 (Slc10a2)                                 |
| -3.4  | Trp53inp1 | transformation related protein 53 inducible nuclear protein 1 (Trp53inp1)    |
| -3.7  | Suox      | sulfite oxidase (Suox), nuclear gene encoding mitochondrial protein          |
| -5.6  | Fabp6     | fatty acid binding protein 6, ileal (gastrotropin) (Fabp6)                   |
| -8.0  | Car3      | carbonic anhydrase 3 (Car3)                                                  |
| -10.1 | Scd1      | stearoyl-Coenzyme A desaturase 1 (Scd1)                                      |

Figure S2

D

GF 72 p.i.

Fold change / uninfected GF

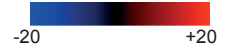

|      | Gene name     | Description                                                                                                  |
|------|---------------|--------------------------------------------------------------------------------------------------------------|
| 19.7 | Ly6a          | lymphocyte antigen 6 complex, locus A (Ly6a)                                                                 |
| 19.3 | Herc5         | hect domain and RLD 5 (Herc5)                                                                                |
| 17.7 | Irgm1         | immunity-related GTPase family M member 1 (Irgm1)                                                            |
| 17.5 | Reg3g         | regenerating islet-derived 3 gamma (Reg3g)                                                                   |
| 17.4 | Gm12250       | predicted gene 12250 (Gm12250)                                                                               |
| 17.0 | ---           | Ring finger protein 213 gene:ENSMUSG00000070327                                                              |
| 15.7 | Gm5431        | predicted gene 5431 (Gm5431)                                                                                 |
| 15.5 | Irgm2         | immunity-related GTPase family M member 2 (Irgm2)                                                            |
| 14.3 | Gbp2          | guanylate binding protein 2 (Gbp2)                                                                           |
| 14.2 | Ifi44         | interferon-induced protein 44 (Ifi44)                                                                        |
| 14.0 | Tgtp1         | T-cell specific GTPase 1 (Tgtp1)                                                                             |
| 14.0 | Upp1          | uridine phosphorylase 1 (Upp1)                                                                               |
| 13.8 | Ilgp1         | interferon inducible GTPase 1 (Ilgp1)                                                                        |
| 12.6 | Mpa2l         | macrophage activation 2 like (Mpa2l)                                                                         |
| 12.0 | Apol10a       | apolipoprotein L 10a (Apol10a)                                                                               |
| 12.0 | Rnf213        | premature mRNA for mKIAA1554 protein.                                                                        |
| 11.4 | Oasl2         | 2'-5' oligoadenylate synthetase-like 2 (Oasl2)                                                               |
| 10.6 | Nudt5         | nudix (nucleoside diphosphate linked moiety X)-type motif 5 (Nudt5)                                          |
| 10.3 | Dmbt1         | deleted in malignant brain tumors 1 (Dmbt1)                                                                  |
| 10.2 | Zbp1          | Z-DNA binding protein 1 (Zbp1)                                                                               |
| 10.0 | Stat1         | signal transducer and activator of transcription 1 (Stat1)                                                   |
| 9.9  | Trim30        | tripartite motif-containing 30 (Trim30)                                                                      |
| 9.8  | Nlrc5         | NLR family, CARD domain containing 5 (Nlrc5)                                                                 |
| 9.5  | Ddx60         | DEAD (Asp-Glu-Ala-Asp) box polypeptide 60 (Ddx60)                                                            |
| 8.9  | Gbp6          | guanylate binding protein 6 (Gbp6)                                                                           |
| 8.9  | Tap1          | transporter 1, ATP-binding cassette, sub-family B (MDR/TAP) (Tap1)                                           |
| 8.6  | Ido1          | indoleamine 2,3-dioxygenase 1 (Ido1)                                                                         |
| 7.2  | Parp14        | poly (ADP-ribose) polymerase family, member 14 (Parp14)                                                      |
| 6.9  | Fabp1         | fatty acid binding protein 1, liver (Fabp1)                                                                  |
| 6.8  | Ifit1         | interferon-induced protein with tetratricopeptide repeats 1 (Ifit1)                                          |
| 6.8  | Oas1g         | 2'-5' oligoadenylate synthetase 1G (Oas1g)                                                                   |
| 6.8  | Usp18         | ubiquitin specific peptidase 18 (Usp18)                                                                      |
| 6.6  | Duox2         | dual oxidase 2 (Duox2)                                                                                       |
| 6.4  | Rtp4          | receptor transporter protein 4 (Rtp4)                                                                        |
| 6.3  | Slfn2         | schlafen 2 (Slfn2)                                                                                           |
| 6.0  | Psmb8         | proteasome (prosome, macropain) subunit, beta type 8 (large multifunctional peptidase 7) (Psmb8)             |
| 5.9  | Duoxa2        | dual oxidase maturation factor 2 (Duoxa2)                                                                    |
| 5.8  | Slc36a1       | solute carrier family 36 (proton/amino acid symporter), member 1 (Slc36a1)                                   |
| 5.7  | Tifa          | TRAF-interacting protein with forkhead-associated domain (Tifa)                                              |
| 5.6  | Alpk1         | alpha-kinase 1 (Alpk1)                                                                                       |
| 5.6  | Oas3          | 2'-5' oligoadenylate synthetase 3 (Oas3)                                                                     |
| 5.4  | Mkl1          | mixed lineage kinase domain-like (Mkl1)                                                                      |
| 5.4  | Sp100         | nuclear antigen Sp100 (Sp100)                                                                                |
| 5.4  | Trim12        | tripartite motif-containing 12 (Trim12)                                                                      |
| 5.1  | Gbp3          | guanylate binding protein 3 (Gbp3)                                                                           |
| 5.1  | Irf7          | interferon regulatory factor 7 (Irf7)                                                                        |
| 5.1  | Ly6e          | lymphocyte antigen 6 complex, locus E (Ly6e)                                                                 |
| 5.1  | Stom          | stomatin (Stom)                                                                                              |
| 5.0  | Fut2          | fucosyltransferase 2 (Fut2)                                                                                  |
| 5.0  | Samhd1        | SAM domain and HD domain, 1 (Samhd1)                                                                         |
| 5.0  | Xdh           | xanthine dehydrogenase (Xdh)                                                                                 |
| 4.9  | Gbp4          | guanylate binding protein 4 (Gbp4)                                                                           |
| 4.8  | Irf1          | interferon regulatory factor 1 (Irf1)                                                                        |
| 4.8  | Slfn5         | schlafen 5 (Slfn5)                                                                                           |
| 4.7  | Ptk6          | PTK6 protein tyrosine kinase 6 (Ptk6)                                                                        |
| 4.6  | Ifitm3        | interferon induced transmembrane protein 3 (Ifitm3)                                                          |
| 4.5  | Stat2         | signal transducer and activator of transcription 2 (Stat2)                                                   |
| 4.4  | Slc9a3        | solute carrier family 9 (sodium/hydrogen exchanger), member 3 (Slc9a3)                                       |
| 4.3  | Dtx3l         | deltex 3-like (Drosophila) (Dtx3l)                                                                           |
| 4.2  | Eif2ak2       | eukaryotic translation initiation factor 2-alpha kinase 2 (Eif2ak2)                                          |
| 4.1  | Cd74          | CD74 antigen (invariant polypeptide of major histocompatibility complex, class II antigen-associated) (Cd74) |
| 4.1  | Gda           | guanine deaminase (Gda)                                                                                      |
| 4.1  | Hk2           | hexokinase 2 (HK2)                                                                                           |
| 4.1  | Rnf19b        | ring finger protein 19B (Rnf19b)                                                                             |
| 4.0  | Dbf4          | DBF4 homolog (S. cerevisiae) (Dbf4)                                                                          |
| 4.0  | Parp9         | poly (ADP-ribose) polymerase family, member 9 (Parp9)                                                        |
| 4.0  | Psmb9         | proteasome (prosome, macropain) subunit, beta type 9 (large multifunctional peptidase 2) (Psmb9)             |
| 4.0  | Tnfsf10       | tumor necrosis factor (ligand) superfamily, member 10 (Tnfsf10)                                              |
| 3.9  | Hsp90b1       | heat shock protein 90, beta (Grp94), member 1 (Hsp90b1)                                                      |
| 3.9  | Il18          | interleukin 18 (Il18)                                                                                        |
| 3.9  | Rnasel        | ribonuclease L (2', 5'-oligoadenylate synthetase-dependent) (Rnasel)                                         |
| 3.8  | 2210415F13Rik | RIKEN cDNA 2210415F13 gene (2210415F13Rik)                                                                   |
| 3.8  | Fam3b         | family with sequence similarity 3, member B (Fam3b)                                                          |
| 3.8  | Tat           | tyrosine aminotransferase (Tat), nuclear gene encoding mitochondrial protein                                 |

Figure S2

D

Fold change / uninfected GF

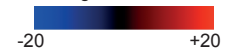

GF 72 p.i.

|     | Gene name     | Description                                                                                       |
|-----|---------------|---------------------------------------------------------------------------------------------------|
| 3.7 | Car4          | carbonic anhydrase 4 (Car4)                                                                       |
| 3.7 | Crel2         | cysteine-rich with EGF-like domains 2 (Crel2)                                                     |
| 3.7 | Nmi           | N-myc (and STAT) interactor (Nmi)                                                                 |
| 3.7 | Pnpt1         | polyribonucleotide nucleotidyltransferase 1 (Pnpt1)                                               |
| 3.6 | Casp3         | caspase 3 (Casp3)                                                                                 |
| 3.6 | Il13ra1       | interleukin 13 receptor, alpha 1 (Il13ra1)                                                        |
| 3.5 | B3galt5       | UDP-Gal:betaGlcNAc beta 1,3-galactosyltransferase, polypeptide 5 (B3galt5)                        |
| 3.5 | Gpx2          | glutathione peroxidase 2 (Gpx2)                                                                   |
| 3.5 | Ifih1         | interferon induced with helicase C domain 1 (Ifih1)                                               |
| 3.5 | Nampt         | nicotinamide phosphoribosyltransferase (Nampt)                                                    |
| 3.5 | Unc93a        | unc-93 homolog A (C. elegans) (Unc93a)                                                            |
| 3.4 | Batf2         | basic leucine zipper transcription factor, ATF-like 2 (Batf2)                                     |
| 3.4 | Ccnd1         | cyclin D1 (Ccnd1)                                                                                 |
| 3.4 | H2-Ab1        | histocompatibility 2, class II antigen A, beta 1 (H2-Ab1)                                         |
| 3.4 | Parp12        | poly (ADP-ribose) polymerase family, member 12 (Parp12)                                           |
| 3.4 | Plac8         | placenta-specific 8 (Plac8)                                                                       |
| 3.3 | 4930420K17Rik | RIKEN cDNA 4930420K17 gene, mRNA (cDNA clone MGC:182285)                                          |
| 3.3 | 4932438A13Rik | RIKEN cDNA 4932438A13 gene (4932438A13Rik)                                                        |
| 3.3 | Adh6a         | alcohol dehydrogenase 6A (class V) (Adh6a)                                                        |
| 3.3 | Ceacam1       | carcinoembryonic antigen-related cell adhesion molecule 1 (Ceacam1)                               |
| 3.3 | Eif2s2        | eukaryotic translation initiation factor 2, subunit 2 (beta) (Eif2s2)                             |
| 3.3 | Hsph1         | heat shock 105kDa/110kDa protein 1 (Hsph1)                                                        |
| 3.3 | Lgals3bp      | lectin, galactoside-binding, soluble, 3 binding protein (Lgals3bp)                                |
| 3.3 | Lgals9        | lectin, galactose binding, soluble 9 (Lgals9)                                                     |
| 3.3 | Mafb          | v-maf musculoaponeurotic fibrosarcoma oncogene family, protein B (avian) (Mafb)                   |
| 3.3 | Nos2          | nitric oxide synthase 2, inducible (Nos2)                                                         |
| 3.2 | BC006779      | cDNA sequence BC006779 (BC006779)                                                                 |
| 3.2 | Bst2          | bone marrow stromal cell antigen 2 (Bst2)                                                         |
| 3.2 | Cycs          | cytochrome c, somatic (Cycs), nuclear gene encoding mitochondrial protein                         |
| 3.2 | Ddx58         | DEAD (Asp-Glu-Ala-Asp) box polypeptide 58 (Ddx58)                                                 |
| 3.1 | Acadl         | acyl-Coenzyme A dehydrogenase, long-chain (Acadl), nuclear gene encoding mitochondrial protein    |
| 3.1 | Arap2         | ArfGAP with RhoGAP domain, ankyrin repeat and PH domain 2 (Arap2)                                 |
| 3.1 | Asns          | asparagine synthetase (Asns)                                                                      |
| 3.1 | Atp8a1        | ATPase, aminophospholipid transporter (APLT), class I, type 8A, member 1 (Atp8a1)                 |
| 3.1 | BC025446      | cDNA sequence BC025446, mRNA (cDNA clone MGC:29251)                                               |
| 3.1 | Casp1         | caspase 1 (Casp1)                                                                                 |
| 3.1 | Dnajb11       | DnaJ (Hsp40) homolog, subfamily B, member 11 (Dnajb11)                                            |
| 3.1 | Gm9992        | predicted gene 9992 (Gm9992)                                                                      |
| 3.1 | Hsd17b6       | hydroxysteroid (17-beta) dehydrogenase 6 (Hsd17b6)                                                |
| 3.1 | Irf8          | interferon regulatory factor 8 (Irf8)                                                             |
| 3.1 | Ly6c1         | lymphocyte antigen 6 complex, locus C1 (Ly6c1)                                                    |
| 3.1 | Ppt1          | palmitoyl-protein thioesterase 1 (Ppt1)                                                           |
| 3.1 | Ube2l6        | ubiquitin-conjugating enzyme E2L 6 (Ube2l6)                                                       |
| 3.0 | Ms4a12        | PREDICTED: membrane-spanning 4-domains, subfamily A, member 12 (Ms4a12)                           |
| 3.0 | Rab8b         | RAB8B, member RAS oncogene family (Rab8b)                                                         |
| 3.0 | Tax1bp1       | Tax1 (human T-cell leukemia virus type I) binding protein 1 (Tax1bp1)                             |
| 3.0 | Ttc39b        | tetratricopeptide repeat domain 39B (Ttc39b)                                                      |
| 3.0 | Vwa5a         | von Willebrand factor A domain containing 5A (Vwa5a)                                              |
| 2.9 | 2210407C18Rik | RIKEN cDNA 2210407C18 gene (2210407C18Rik)                                                        |
| 2.9 | Chordc1       | cysteine and histidine-rich domain (CHORD)-containing, zinc-binding protein 1 (Chordc1)           |
| 2.9 | Chst4         | carbohydrate (chondroitin 6/keratan) sulfotransferase 4 (Chst4)                                   |
| 2.9 | Lpgat1        | lysophosphatidylglycerol acyltransferase 1 (Lpgat1)                                               |
| 2.9 | Mmp7          | matrix metalloproteinase 7 (Mmp7)                                                                 |
| 2.9 | Mpp5          | membrane protein, palmitoylated 5 (MAGUK p55 subfamily member 5) (Mpp5)                           |
| 2.9 | Npm1          | nucleophosmin 1 (Npm1)                                                                            |
| 2.9 | Phgdh         | 3-phosphoglycerate dehydrogenase (Phgdh)                                                          |
| 2.9 | Pla2g16       | phospholipase A2, group XVI (Pla2g16)                                                             |
| 2.9 | Rnf160        | ring finger protein 160 (Rnf160)                                                                  |
| 2.9 | Rrbp1         | ribosome binding protein 1 (Rrbp1)                                                                |
| 2.9 | Trafd1        | TRAF type zinc finger domain containing 1 (Trafd1)                                                |
| 2.8 | Al451617      | expressed sequence Al451617 (Al451617)                                                            |
| 2.8 | Cd38          | CD38 antigen (Cd38)                                                                               |
| 2.8 | Ext1          | exostoses (multiple) 1 (Ext1)                                                                     |
| 2.8 | H2-T22        | histocompatibility 2, T region locus 22 (H2-T22)                                                  |
| 2.8 | Hsp90aa1      | heat shock protein 90, alpha (cytosolic), class A member 1 (Hsp90aa1)                             |
| 2.8 | Pla2g2a       | phospholipase A2, group IIA (platelets, synovial fluid) (Pla2g2a)                                 |
| 2.8 | Psme2         | proteasome (prosome, macropain) 28 subunit, beta (Psme2)                                          |
| 2.8 | Slc5a12       | solute carrier family 5 (sodium/glucose cotransporter), member 12 (Slc5a12)                       |
| 2.8 | Top2a         | topoisomerase (DNA) II alpha (Top2a)                                                              |
| 2.7 | ---           | gij34538597[ref NC_005089.1 :2676-2750, tRNA-Leu                                                  |
| 2.7 | Aldh4a1       | aldehyde dehydrogenase 4 family, member A1 (Aldh4a1), nuclear gene encoding mitochondrial protein |
| 2.7 | Apobec3       | apolipoprotein B mRNA editing enzyme, catalytic polypeptide 3 (Apobec3)                           |
| 2.7 | Ascc3         | activating signal cointegrator 1 complex subunit 3 (Ascc3)                                        |
| 2.7 | Dnaja1        | DnaJ (Hsp40) homolog, subfamily A, member 1 (Dnaja1)                                              |

GF 72 p.i.

|     | Gene name     | Description                                                                                                 |
|-----|---------------|-------------------------------------------------------------------------------------------------------------|
| 2.7 | Gm6548        | predicted gene 6548 (Gm6548), non-coding RNA.                                                               |
| 2.7 | Oas1a         | 2'-5' oligoadenylate synthetase 1A (Oas1a)                                                                  |
| 2.7 | Ociad2        | OCIA domain containing 2 (Ociad2)                                                                           |
| 2.7 | Ripk3         | receptor-interacting serine-threonine kinase 3 (Ripk3)                                                      |
| 2.7 | Serping1      | serine (or cysteine) peptidase inhibitor, clade G, member 1 (Serping1)                                      |
| 2.7 | Vmn2r-ps14    | vomer nasal 2, receptor, pseudogene 14 (Vmn2r-ps14), non-coding RNA.                                        |
| 2.7 | Zcchc11       | zinc finger, CCHC domain containing 11 (Zcchc11)                                                            |
| 2.6 | Adar          | adenosine deaminase, RNA-specific (Adar)                                                                    |
| 2.6 | Aspa          | aspartoacylase (Aspa)                                                                                       |
| 2.6 | Dcp2          | DCP2 decapping enzyme homolog (S. cerevisiae) (Dcp2)                                                        |
| 2.6 | Ftsjd2        | FtsJ methyltransferase domain containing 2 (Ftsjd2)                                                         |
| 2.6 | H2-Eb1        | histocompatibility 2, class II antigen E beta (H2-Eb1)                                                      |
| 2.6 | H2-gs10       | MHC class I like protein GS10 (H2-gs10)                                                                     |
| 2.6 | Hspa5         | heat shock protein 5 (Hspa5)                                                                                |
| 2.6 | Hspd1         | heat shock protein 1 (chaperonin) (Hspd1), nuclear gene encoding mitochondrial protein                      |
| 2.6 | Hyou1         | hypoxia up-regulated 1 (Hyou1)                                                                              |
| 2.6 | Irf9          | interferon regulatory factor 9 (Irf9)                                                                       |
| 2.6 | Ppm1k         | protein phosphatase 1K (PP2C domain containing) (Ppm1k)                                                     |
| 2.6 | Smarca5       | SWI/SNF related, matrix associated, actin dependent regulator of chromatin, subfamily a, member 5 (Smarca5) |
| 2.6 | Tm4sf20       | transmembrane 4 L six family member 20 (Tm4sf20)                                                            |
| 2.6 | Tmc5          | transmembrane channel-like gene family 5 (Tmc5)                                                             |
| 2.6 | Wars          | tryptophanyl-tRNA synthetase (Wars)                                                                         |
| 2.5 | ---           | Ig kappa chain, mRNA (cDNA clone MGC:30228)                                                                 |
| 2.5 | 1110059E24Rik | RIKEN cDNA 1110059E24 gene, mRNA (cDNA clone MGC:30990)                                                     |
| 2.5 | Btnl7         | butyrophilin-like 7 (Btnl7)                                                                                 |
| 2.5 | Calu          | calumenin (Calu)                                                                                            |
| 2.5 | Ccdc25        | coiled-coil domain containing 25 (Ccdc25)                                                                   |
| 2.5 | Erap1         | endoplasmic reticulum aminopeptidase 1 (Erap1)                                                              |
| 2.5 | Gcnt3         | glucosaminyl (N-acetyl) transferase 3, mucin type (Gcnt3)                                                   |
| 2.5 | H2-Aa         | histocompatibility 2, class II antigen A, alpha (H2-Aa)                                                     |
| 2.5 | Hat1          | histone aminotransferase 1 (Hat1)                                                                           |
| 2.5 | Pdia4         | protein disulfide isomerase associated 4 (Pdia4)                                                            |
| 2.5 | Ppm1h         | protein phosphatase 1H (PP2C domain containing) (Ppm1h)                                                     |
| 2.5 | Prpf40a       | PRP40 pre-mRNA processing factor 40 homolog A (yeast) (Prpf40a)                                             |
| 2.5 | Sbno2         | strawberry notch homolog 2 (Drosophila) (Sbno2)                                                             |
| 2.5 | Set           | SET translocation (Set)                                                                                     |
| 2.5 | Slc44a1       | Solute carrier family 44, member 1 gene:ENSMUSG00000028412                                                  |
| 2.5 | Socs3         | suppressor of cytokine signaling 3 (Socs3)                                                                  |
| 2.5 | Uggt1         | UDP-glucose glycoprotein glucosyltransferase 1 (Uggt1)                                                      |
| 2.5 | Zc3h7a        | zinc finger CCCH type containing 7 A (Zc3h7a)                                                               |
| 2.4 | 2810417H13Rik | RIKEN cDNA 2810417H13 gene (2810417H13Rik)                                                                  |
| 2.4 | Bco2          | beta-carotene oxygenase 2 (Bco2)                                                                            |
| 2.4 | Cbx3          | chromobox homolog 3 (Drosophila HP1 gamma) (Cbx3)                                                           |
| 2.4 | Galnt1        | UDP-N-acetyl-alpha-D-galactosamine:polypeptide N-acetylgalactosaminyltransferase 1 (Galnt1)                 |
| 2.4 | Glod5         | glyoxalase domain containing 5 (Glod5)                                                                      |
| 2.4 | H2-Q6         | histocompatibility 2, Q region locus 6 (H2-Q6)                                                              |
| 2.4 | Ptges3        | prostaglandin E synthase 3 (cytosolic) (Ptges3)                                                             |
| 2.4 | Rpn1          | ribophorin I (Rpn1)                                                                                         |
| 2.4 | Slc30a5       | solute carrier family 30 (zinc transporter), member 5 (Slc30a5)                                             |
| 2.4 | Smpdl3b       | sphingomyelin phosphodiesterase, acid-like 3B (Smpdl3b)                                                     |
| 2.4 | Sulf2         | sulfatase 2 (Sulf2)                                                                                         |
| 2.4 | Tra2a         | transformer 2 alpha homolog (Drosophila) (Tra2a)                                                            |
| 2.3 | A230046K03Rik | RIKEN cDNA A230046K03 gene (A230046K03Rik)                                                                  |
| 2.3 | C1galt1       | core 1 synthase, glycoprotein-N-acetylgalactosamine 3-beta-galactosyltransferase, 1 (C1galt1)               |
| 2.3 | Denr          | density-regulated protein (Denr)                                                                            |
| 2.3 | Eif1a         | eukaryotic translation initiation factor 1A (Eif1a)                                                         |
| 2.3 | Elmo1         | engulfment and cell motility 1, ced-12 homolog (C. elegans) (Elmo1)                                         |
| 2.3 | Ifi35         | interferon-induced protein 35 (Ifi35)                                                                       |
| 2.3 | Myd88         | myeloid differentiation primary response gene 88 (Myd88)                                                    |
| 2.3 | Purb          | Transcriptional activator protein Pur-beta gene:ENSMUSG00000049647                                          |
| 2.3 | Tgm2          | transglutaminase 2, C polypeptide (Tgm2)                                                                    |

Figure S2

D

Fold change / uninfected GF  
  
 -20 +20

GF 72 p.i.

|      | Gene name     | Description                                                                              |
|------|---------------|------------------------------------------------------------------------------------------|
| -9.2 | Cyp2d26       | cytochrome P450, family 2, subfamily d, polypeptide 26 (Cyp2d26)                         |
| -7.8 | Cubn          | cubilin (intrinsic factor-cobalamin receptor) (Cubn)                                     |
| -7.7 | Tm4sf4        | transmembrane 4 superfamily member 4 (Tm4sf4)                                            |
| -6.5 | Gsta4         | glutathione S-transferase, alpha 4 (Gsta4)                                               |
| -6.3 | Scd1          | stearoyl-Coenzyme A desaturase 1 (Scd1)                                                  |
| -5.8 | Car3          | carbonic anhydrase 3 (Car3)                                                              |
| -5.6 | Cyp2c65       | cytochrome P450, family 2, subfamily c, polypeptide 65 (Cyp2c65)                         |
| -5.3 | Akr1c14       | aldo-keto reductase family 1, member C14 (Akr1c14)                                       |
| -5.1 | Reg4          | regenerating islet-derived family, member 4 (Reg4)                                       |
| -4.5 | Slc5a4b       | solute carrier family 5 (neutral amino acid transporters, system A), member 4b (Slc5a4b) |
| -4.4 | Akr1c19       | aldo-keto reductase family 1, member C19 (Akr1c19)                                       |
| -4.4 | Mt2           | metallothionein 2 (Mt2)                                                                  |
| -4.0 | Sord          | sorbitol dehydrogenase (Sord)                                                            |
| -3.9 | Pmp22         | peripheral myelin protein 22 (Pmp22)                                                     |
| -3.7 | S100a6        | S100 calcium binding protein A6 (calcyclin) (S100a6)                                     |
| -3.5 | Nt5e          | 5' nucleotidase, ecto (Nt5e)                                                             |
| -3.5 | Tmem195       | transmembrane protein 195 (Tmem195)                                                      |
| -3.2 | Fgf15         | fibroblast growth factor 15 (Fgf15)                                                      |
| -3.2 | Gsta1         | glutathione S-transferase, alpha 1 (Ya) (Gsta1)                                          |
| -3.2 | Gstm3         | glutathione S-transferase, mu 3 (Gstm3)                                                  |
| -3.0 | Tm7sf2        | transmembrane 7 superfamily member 2 (Tm7sf2)                                            |
| -2.9 | Adh1          | alcohol dehydrogenase 1 (class I) (Adh1)                                                 |
| -2.9 | Gsta2         | glutathione S-transferase, alpha 2 (Yc2) (Gsta2)                                         |
| -2.8 | Gm10639       | predicted gene 10639 (Gm10639)                                                           |
| -2.7 | 2010109I03Rik | RIKEN cDNA 2010109I03 gene (2010109I03Rik)                                               |
| -2.7 | Trp53inp1     | transformation related protein 53 inducible nuclear protein 1 (Trp53inp1)                |
| -2.6 | Cldn4         | claudin 4 (Cldn4)                                                                        |
| -2.6 | Hist1h1c      | histone cluster 1, H1c (Hist1h1c)                                                        |
| -2.5 | Mt1           | metallothionein 1 (Mt1)                                                                  |
| -2.5 | Olfir767      | olfactory receptor 767 (Olfir767)                                                        |
| -2.5 | Pnliprp2      | pancreatic lipase-related protein 2 (Pnliprp2)                                           |
| -2.4 | Id2           | inhibitor of DNA binding 2 (Id2)                                                         |
| -2.4 | Slc28a2       | solute carrier family 28 (sodium-coupled nucleoside transporter), member 2 (Slc28a2)     |
